# Supplementary material for: Workplace interventions for cardiovascular diseases: protocol of a systematic review and meta-analysis
Source: HighWire-hosted journal article supplement (doi:10.1136/bmjopen-2022-061586), 2022-08-01
Supplement: bmjopen-2022-061586supp002_data_supplement.pdf [file bmjopen-2022-061586supp002_data_supplement.pdf]

## Supplementary Material 2: Proposed Ovid Embase Search Strategy

### Population

No search strings.

### Intervention

1. (worksite or workplace or job or workspace).mp.
2. (intervention\* or trial\* or experiment\*).mp.
3. 1 and 2

### Outcome

4. exp cardiovascular disease/ or exp cardiovascular risk/ or exp cardiovascular effect/ or exp cardiovascular mortality/ or exp cardiovascular risk factor/
5. heart disease.mp.
6. ischemic heart disease.mp. or exp ischemic heart disease/
7. acute heart infarction.mp. or exp acute heart infarction/
8. heart attack.mp. or heart infarction/
9. infarct.mp. or exp infarction/
10. angina.mp. or exp angina pectoris/
11. exp cerebrovascular disease/ or exp cerebrovascular accident/ or cerebrovascular.mp.
12. brain ischemia.mp. or exp brain ischemia/
13. exp heart muscle ischemia/
14. \*obesity/
15. exp body weight/ or exp body mass/
16. body fat.mp.
17. exp low density lipoprotein cholesterol/ or exp cholesterol blood level/ or exp low density lipoprotein cholesterol level/
18. exp cholesterol diet/ or exp low density lipoprotein cholesterol/ or exp low density lipoprotein cholesterol level/ or exp total cholesterol level/ or exp high density lipoprotein cholesterol/ or exp cholesterol intake/ or exp high density lipoprotein cholesterol level/
19. triglycerides.mp. or exp triacylglycerol/
20. blood pressure.mp. or exp blood pressure/
21. systolic blood pressure.mp. or systolic blood pressure/
22. diastolic blood pressure.mp. or diastolic blood pressure/
23. exp glucose blood level/
24. exp high-glucose diet/
25. exp healthy diet/ or exp unhealthy diet/ or exp high salt diet/ or exp high calorie diet/ or exp diet composition/
26. exp exercise/ or exp physical inactivity/ or exp physical activity/
27. exp cigarette smoking/ or \*smoking/
28. smoking habit/
29. exp alcohol consumption/
30. 4 or 5 or 6 or 7 or 8 or 9 or 10 or 11 or 12 or 13 or 14 or 15 or 16 or 17 or 18 or 19 or 20 or 21 or 22 or 23 or 24 or 25 or 26 or 27 or 28 or 29

**Study design**

31. exp clinical trial/ or exp randomized controlled trial/ or exp controlled study/ or trial.mp.
  32. experiment.mp. or exp experiment/ or exp human experiment/
  33. intervention.mp. or exp intervention study/
  34. exp quasi experimental study/
  35. 31 or 32 or 33 or 34
- 
34. 4 and 29 and 33
